# Supplementary material
Source: MDPI journal article supplement (https://www.mdpi.com/2073-4441/14/1/94)
Supplement: s1 [file s1]

## Supplementary Materials

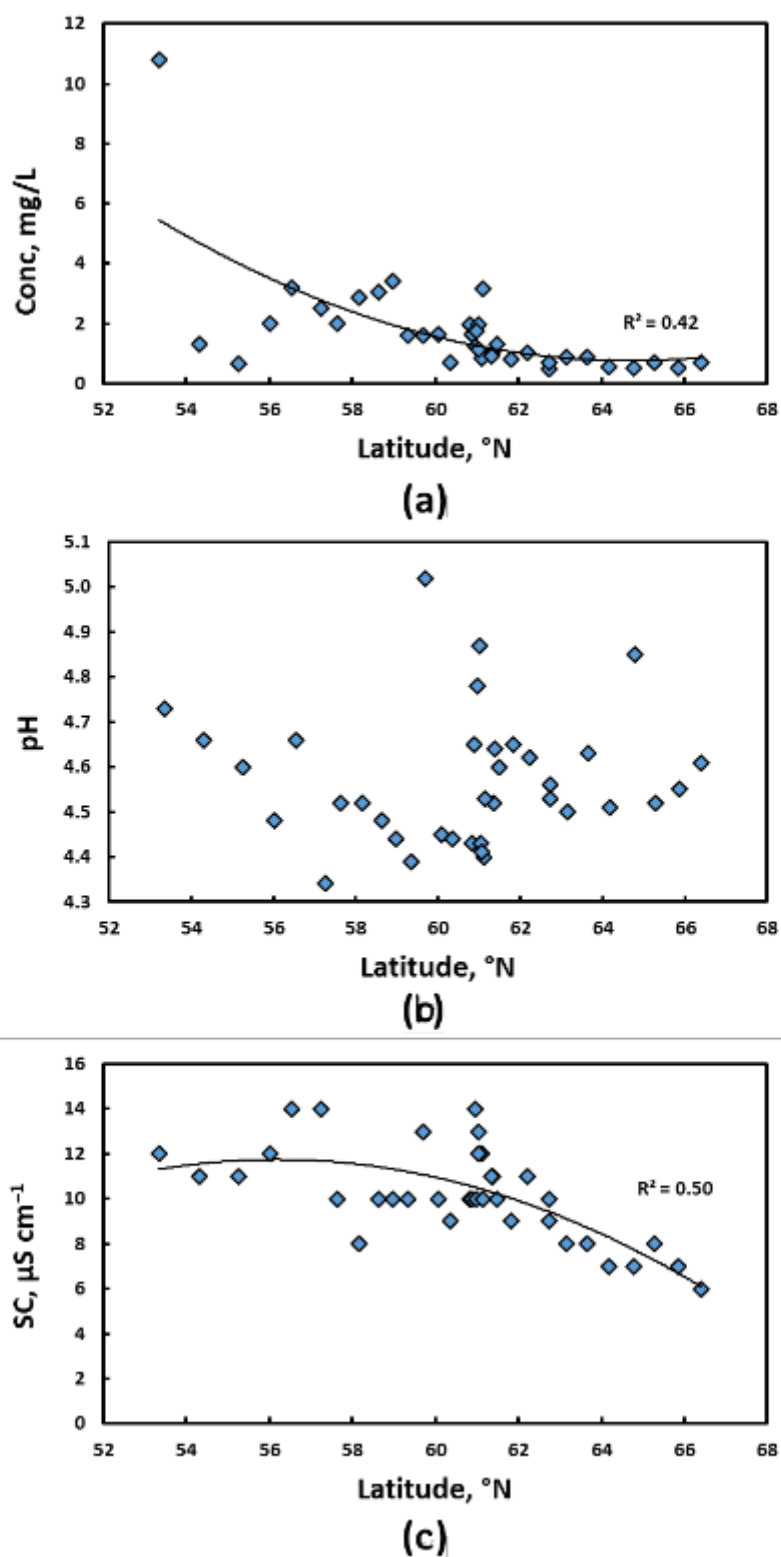

**Figure S1.** Examples of the concentration of SC, pH in snow water as a function of latitude.

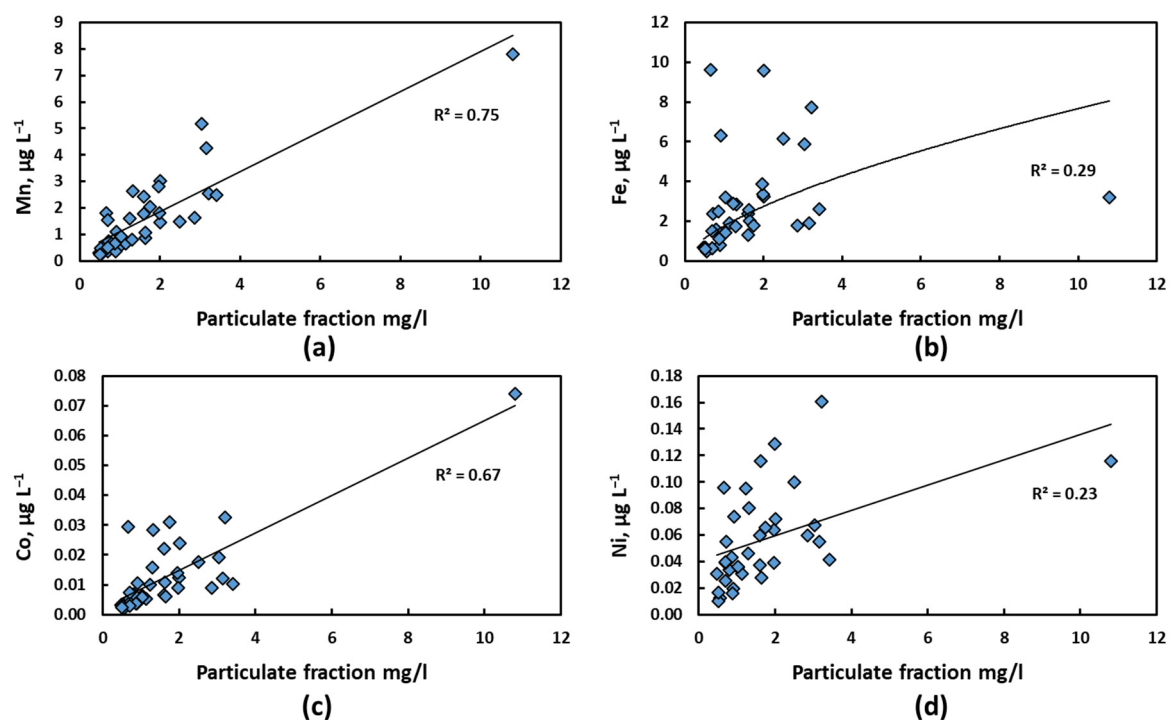

Figure S2. Examples of Mn, Fe, Co, and Ni in snow water as a function of particulate fraction.

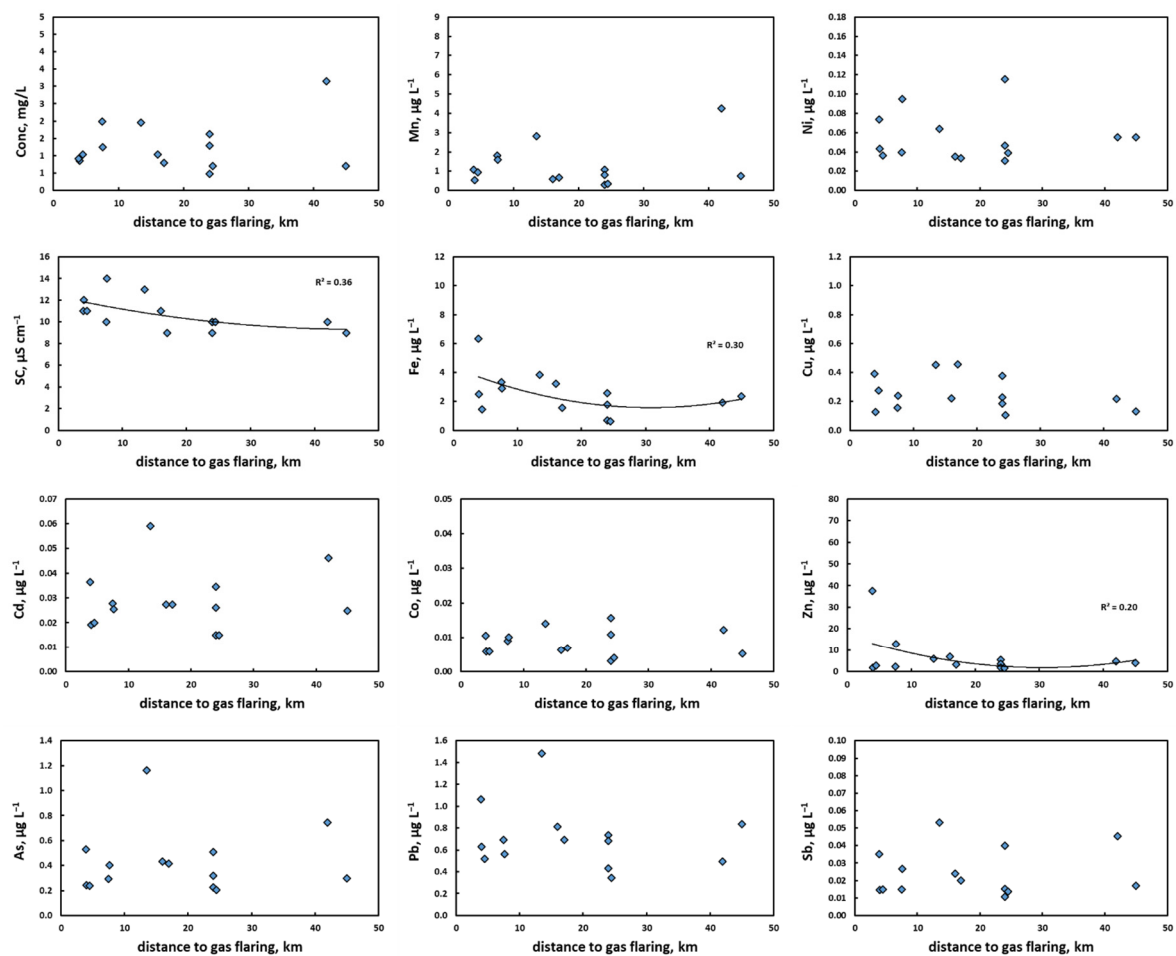

**Figure S3.** Examples of the concentration of SC, Mn, Ni, Fe, Cu, Cd, Co, Zn, As, Pb, and Sb in snow water as a function of distance to gas flaring.

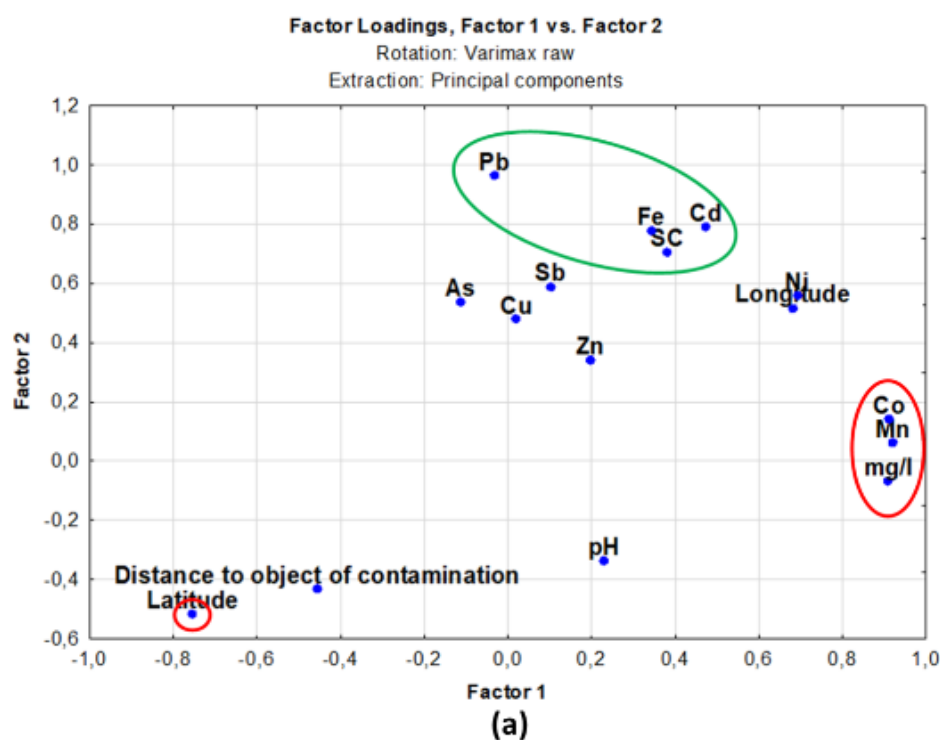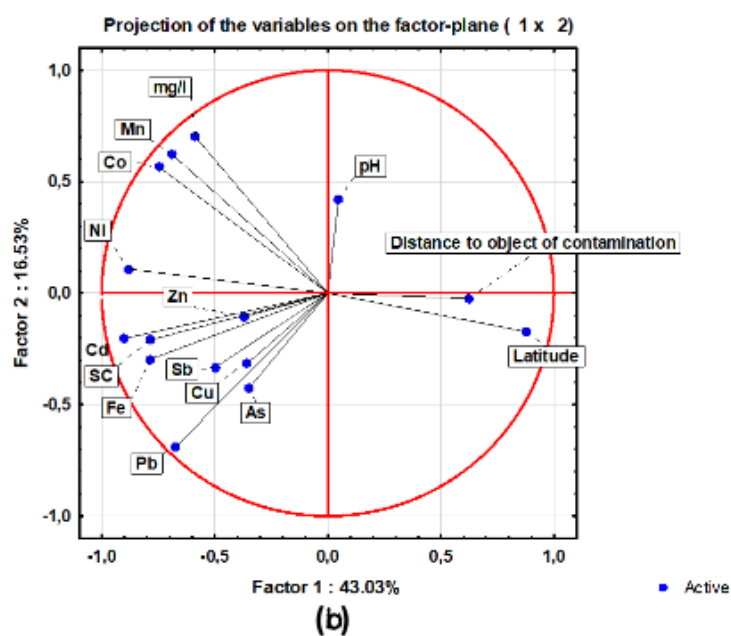

**Figure S4.** PCA factorial map  $F1 \times F2$  of elements of a reconstructed table for the dissolved fraction.

**Table S1.** Physico-chemical properties of dissolved (< 0.22 µm) fraction of the snow water trace element concentrations (µg/L) in Western Siberia latitudinal transect

| Sample name | Latitude °N | Longitude °E | mg/l | pH   | Specific Conducti-vity | Mn   | Fe   | Co    | Ni    | Cu   | Zn    | As   | Cd    | Sb    | Pb   |
|-------------|-------------|--------------|------|------|------------------------|------|------|-------|-------|------|-------|------|-------|-------|------|
| SN20-1      | 53.353110   | 84.115650    | 10.8 | 4.73 | 12                     | 7.81 | 3.20 | 0.074 | 0.116 | 0.06 | 2.23  | 0.33 | 0.036 | 0.018 | 0.19 |
| SN20-2      | 54.313820   | 83.268000    | 1.3  | 4.66 | 11                     | 2.63 | 2.84 | 0.028 | 0.080 | 0.36 | 3.07  | 0.29 | 0.037 | 0.029 | 0.67 |
| SN20-3      | 55.267670   | 82.721080    | 0.7  | 4.60 | 11                     | 1.80 | 9.62 | 0.029 | 0.096 | 0.31 | 3.09  | 0.26 | 0.040 | 0.240 | 1.17 |
| SN20-4      | 56.030940   | 83.776950    | 2.0  | 4.48 | 12                     | 1.47 | 9.56 | 0.024 | 0.072 | 0.25 | 2.93  | 0.32 | 0.044 | 0.054 | 1.15 |
| SN20-5      | 56.539973   | 84.059395    | 3.2  | 4.66 | 14                     | 2.54 | 7.74 | 0.033 | 0.160 | 0.40 | 19.69 | 0.25 | 0.052 | 0.071 | 1.36 |
| SN20-6      | 57.253698   | 83.923628    | 2.5  | 4.34 | 14                     | 1.50 | 6.15 | 0.018 | 0.100 | 0.23 | 22.14 | 0.25 | 0.044 | 0.032 | 1.30 |
| SN20-7      | 57.639776   | 83.551018    | 2.0  | 4.52 | 10                     | 3.01 | 3.25 | 0.012 | 0.129 | 0.19 | 74.91 | 0.16 | 0.042 | 0.021 | 0.66 |
| SN20-8      | 58.165450   | 82.552152    | 2.9  | 4.52 | 8                      | 1.63 | 1.80 | 0.009 | 0.060 | 0.96 | 19.99 | 0.15 | 0.027 | 0.013 | 0.50 |
| SN20-9      | 58.644013   | 81.665805    | 3.0  | 4.48 | 10                     | 5.19 | 5.86 | 0.019 | 0.067 | 0.22 | 7.68  | 0.26 | 0.044 | 0.025 | 0.63 |
| SN20-10     | 58.980790   | 80.612990    | 3.4  | 4.44 | 10                     | 2.50 | 2.59 | 0.010 | 0.041 | 0.13 | 2.95  | 0.24 | 0.038 | 0.017 | 0.51 |
| SN20-11     | 59.339339   | 79.765788    | 1.6  | 4.39 | 10                     | 2.42 | 1.31 | 0.022 | 0.060 | 0.21 | 12.16 | 0.25 | 0.027 | 0.016 | 0.61 |
| SN20-12     | 59.696980   | 78.935680    | 1.6  | 5.02 | 13                     | 1.77 | 2.36 | 0.007 | 0.038 | 0.13 | 4.97  | 0.25 | 0.030 | 0.016 | 0.59 |
| SN20-13     | 60.075950   | 78.135140    | 1.6  | 4.45 | 10                     | 0.86 | 2.01 | 0.006 | 0.028 | 0.11 | 2.44  | 0.28 | 0.034 | 0.016 | 0.66 |
| SN20-14     | 60.353770   | 77.478310    | 0.7  | 4.44 | 9                      | 0.75 | 2.36 | 0.005 | 0.055 | 0.13 | 4.12  | 0.30 | 0.025 | 0.017 | 0.84 |
| SN20-15     | 60.830600   | 77.240780    | 2.0  | 4.43 | 10                     | 1.81 | 3.34 | 0.009 | 0.039 | 0.16 | 2.41  | 0.29 | 0.028 | 0.015 | 0.69 |
| SN20-16     | 61.116430   | 75.851770    | 0.9  | 4.40 | 12                     | 0.55 | 2.48 | 0.006 | 0.043 | 0.13 | 1.81  | 0.24 | 0.019 | 0.015 | 0.63 |
| SN20-17     | 61.379444   | 74.916667    | 1.0  | 4.64 | 11                     | 0.59 | 3.21 | 0.006 | 0.035 | 0.22 | 6.83  | 0.43 | 0.027 | 0.024 | 0.81 |
| SN20-18     | 61.343056   | 73.683333    | 0.9  | 4.52 | 11                     | 1.09 | 6.32 | 0.010 | 0.074 | 0.39 | 37.65 | 0.53 | 0.037 | 0.035 | 1.06 |
| SN20-19     | 60.962170   | 72.538410    | 1.2  | 4.78 | 14                     | 1.60 | 2.88 | 0.010 | 0.095 | 0.24 | 13.04 | 0.40 | 0.026 | 0.027 | 0.56 |
| SN20-20     | 60.879560   | 71.367550    | 1.6  | 4.65 | 10                     | 1.07 | 2.57 | 0.011 | 0.116 | 0.23 | 5.43  | 0.32 | 0.026 | 0.015 | 0.74 |
| SN20-21     | 61.033490   | 69.985940    | 2.0  | 4.43 | 13                     | 2.83 | 3.86 | 0.014 | 0.064 | 0.45 | 6.05  | 1.16 | 0.059 | 0.053 | 1.48 |

|         |           |           |     |      |    |      |      |       |       |      |      |      |       |       |      |
|---------|-----------|-----------|-----|------|----|------|------|-------|-------|------|------|------|-------|-------|------|
| SN20-22 | 61.052037 | 68.652663 | 1.1 | 4.41 | 12 | 0.66 | 1.92 | 0.005 | 0.031 | 0.27 | 3.15 | 0.57 | 0.030 | 0.028 | 0.86 |
| SN20-23 | 60.999156 | 68.900517 | 1.8 | 4.87 | 10 | 2.05 | 1.77 | 0.031 | 0.066 | 0.34 | 5.18 | 0.38 | 0.043 | 0.025 | 0.70 |
| SN20-24 | 61.138230 | 67.769780 | 3.2 | 4.53 | 10 | 4.25 | 1.91 | 0.012 | 0.055 | 0.22 | 4.85 | 0.74 | 0.046 | 0.045 | 0.50 |
| SN20-25 | 61.480500 | 66.831950 | 1.3 | 4.60 | 10 | 0.81 | 1.76 | 0.016 | 0.046 | 0.38 | 3.53 | 0.51 | 0.035 | 0.040 | 0.68 |
| SN20-26 | 61.828180 | 66.024740 | 0.8 | 4.65 | 9  | 0.66 | 1.57 | 0.007 | 0.034 | 0.46 | 3.25 | 0.42 | 0.027 | 0.020 | 0.69 |
| SN20-27 | 62.231080 | 65.458900 | 1.0 | 4.62 | 11 | 0.94 | 1.44 | 0.006 | 0.036 | 0.27 | 2.79 | 0.24 | 0.020 | 0.015 | 0.52 |
| SN20-28 | 62.735510 | 65.456760 | 0.5 | 4.53 | 9  | 0.30 | 0.69 | 0.003 | 0.031 | 0.19 | 1.92 | 0.22 | 0.015 | 0.011 | 0.43 |
| SN20-29 | 62.734590 | 65.419840 | 0.7 | 4.56 | 10 | 0.36 | 0.62 | 0.004 | 0.039 | 0.11 | 1.52 | 0.20 | 0.015 | 0.014 | 0.35 |
| SN20-30 | 63.154290 | 64.769320 | 0.9 | 4.50 | 8  | 0.38 | 0.80 | 0.004 | 0.020 | 0.12 | 1.95 | 0.30 | 0.020 | 0.015 | 0.51 |
| SN20-31 | 63.656070 | 64.724190 | 0.9 | 4.63 | 8  | 0.67 | 1.13 | 0.004 | 0.016 | 0.25 | 4.18 | 0.20 | 0.015 | 0.015 | 0.41 |
| SN20-32 | 64.184470 | 65.392610 | 0.6 | 4.51 | 7  | 0.31 | 0.49 | 0.002 | 0.012 | 0.09 | 1.35 | 0.19 | 0.013 | 0.010 | 0.31 |
| SN20-33 | 64.773900 | 65.146220 | 0.5 | 4.85 | 7  | 0.48 | 0.69 | 0.003 | 0.010 | 0.07 | 2.15 | 0.21 | 0.014 | 0.011 | 0.32 |
| SN20-34 | 65.292940 | 64.747451 | 0.7 | 4.52 | 8  | 0.52 | 0.63 | 0.003 | 0.040 | 0.08 | 4.54 | 0.20 | 0.015 | 0.017 | 0.39 |
| SN20-35 | 65.854647 | 65.027917 | 0.5 | 4.55 | 7  | 0.24 | 0.60 | 0.002 | 0.016 | 0.10 | 1.56 | 0.18 | 0.013 | 0.010 | 0.42 |
| SN20-36 | 66.400238 | 66.234517 | 0.7 | 4.61 | 6  | 1.53 | 1.50 | 0.007 | 0.025 | 0.07 | 1.92 | 0.16 | 0.010 | 0.007 | 0.23 |

**Table S2.** Spearman correlations  $p < 0,05$

|                                                | Distance to<br>object of<br>contami-<br>nation | Latitude<br>°N | Concentr<br>ation<br>mg/L | pH    | SC    | Mn    | Fe    | Co    | Ni    | Cu    | Zn    | As    | Cd    | Sb    | Pb    |
|------------------------------------------------|------------------------------------------------|----------------|---------------------------|-------|-------|-------|-------|-------|-------|-------|-------|-------|-------|-------|-------|
| Distance to<br>object of<br>contami-<br>nation | 1.00                                           | 0.48           | -0.68                     | 0.24  | -0.54 | -0.64 | -0.51 | -0.52 | -0.60 | -0.23 | -0.50 | -0.22 | -0.51 | -0.42 | -0.28 |
| Latitude°N                                     | 0.48                                           | 1.00           | -0.72                     | 0.10  | -0.62 | -0.74 | -0.77 | -0.78 | -0.78 | -0.33 | -0.44 | -0.20 | -0.74 | -0.55 | -0.49 |
| Concentra-<br>tion mg/L                        | -0.68                                          | -0.72          | 1.00                      | -0.13 | 0.50  | 0.80  | 0.60  | 0.71  | 0.61  | 0.30  | 0.52  | 0.30  | 0.78  | 0.48  | 0.31  |
| pH                                             | 0.24                                           | 0.10           | -0.13                     | 1.00  | -0.01 | 0.04  | -0.13 | 0.10  | 0.04  | 0.08  | 0.02  | 0.02  | -0.12 | -0.02 | -0.24 |
| SC                                             | -0.54                                          | -0.62          | 0.50                      | -0.01 | 1.00  | 0.46  | 0.72  | 0.57  | 0.62  | 0.40  | 0.39  | 0.50  | 0.63  | 0.66  | 0.60  |
| Mn                                             | -0.64                                          | -0.74          | 0.80                      | 0.04  | 0.46  | 1.00  | 0.65  | 0.84  | 0.71  | 0.31  | 0.52  | 0.25  | 0.76  | 0.53  | 0.26  |
| Fe                                             | -0.51                                          | -0.77          | 0.60                      | -0.13 | 0.72  | 0.65  | 1.00  | 0.72  | 0.74  | 0.43  | 0.52  | 0.44  | 0.78  | 0.71  | 0.72  |
| Co                                             | -0.52                                          | -0.78          | 0.71                      | 0.10  | 0.57  | 0.84  | 0.72  | 1.00  | 0.84  | 0.50  | 0.51  | 0.40  | 0.81  | 0.70  | 0.50  |
| Ni                                             | -0.60                                          | -0.78          | 0.61                      | 0.04  | 0.62  | 0.71  | 0.74  | 0.84  | 1.00  | 0.42  | 0.62  | 0.30  | 0.70  | 0.65  | 0.50  |
| Cu                                             | -0.23                                          | -0.33          | 0.30                      | 0.08  | 0.40  | 0.31  | 0.43  | 0.50  | 0.42  | 1.00  | 0.59  | 0.43  | 0.54  | 0.60  | 0.66  |
| Zn                                             | -0.50                                          | -0.44          | 0.52                      | 0.02  | 0.39  | 0.52  | 0.52  | 0.51  | 0.62  | 0.59  | 1.00  | 0.27  | 0.56  | 0.58  | 0.51  |
| As                                             | -0.22                                          | -0.20          | 0.30                      | 0.02  | 0.50  | 0.25  | 0.44  | 0.40  | 0.30  | 0.43  | 0.27  | 1.00  | 0.53  | 0.68  | 0.58  |
| Cd                                             | -0.51                                          | -0.74          | 0.78                      | -0.12 | 0.63  | 0.76  | 0.78  | 0.81  | 0.70  | 0.54  | 0.56  | 0.53  | 1.00  | 0.84  | 0.65  |
| Sb                                             | -0.42                                          | -0.55          | 0.48                      | -0.02 | 0.66  | 0.53  | 0.71  | 0.70  | 0.65  | 0.60  | 0.58  | 0.68  | 0.84  | 1.00  | 0.70  |
| Pb                                             | -0.28                                          | -0.49          | 0.31                      | -0.24 | 0.60  | 0.26  | 0.72  | 0.50  | 0.50  | 0.66  | 0.51  | 0.58  | 0.65  | 0.70  | 1.00  |

**Table S3.** The distance between the sampling point and some nearest possible source of pollution.

| <b>Sample name</b> | <b>Distance to potential object of pollution, km</b> | <b>Possible source of pollution</b> |
|--------------------|------------------------------------------------------|-------------------------------------|
| SN20-1 (0.22)      | 3                                                    | Small village                       |
| SN20-2 (0.22)      | 23                                                   | Small village                       |
| SN20-3 (0.22)      | 32                                                   | Big city                            |
| SN20-4 (0.22)      | 20                                                   | Big city                            |
| SN20-5 (0.22)      | 1                                                    | Small village                       |
| SN20-6 (0.22)      | 17                                                   | Small village                       |
| SN20-7 (0.22)      | 1.5                                                  | Small village                       |
| SN20-8 (0.22)      | 19                                                   | Small village                       |
| SN20-9 (0.22)      | 3                                                    | Small village                       |
| SN20-10 (0.22)     | 2.5                                                  | Small village                       |
| SN20-11 (0.22)     | 6                                                    | Small village                       |
| SN20-13 (0.22)     | 40                                                   | Small village                       |
| SN20-14 (0.22)     | 21                                                   | Small village                       |
| SN20-15 (0.22)     | 7.6                                                  | Torch                               |
| SN20-16 (0.22)     | 3.7                                                  | Torch                               |
| SN20-17 (0.22)     | 21                                                   | Torch                               |
| SN20-18 (0.22)     | 11                                                   | Big city                            |
| SN20-19 (0.22)     | 7.5                                                  | Torch                               |
| SN20-21 (0.22)     | 15.6                                                 | Torch                               |
| SN20-22 (0.22)     | 4.6                                                  | Big city                            |
| SN20-23 (0.22)     | 19                                                   | Big city                            |
| SN20-26 (0.22)     | 17                                                   | Torch                               |
| SN20-27 (0.22)     | 10                                                   | Big city                            |
| SN20-28 (0.22)     | 65                                                   | Big city                            |
| SN20-29 (0.22)     | 65                                                   | Big city                            |
| SN20-30 (0.22)     | 51                                                   | Small town                          |
| SN20-31 (0.22)     | 51                                                   | Small town                          |
| SN20-32 (0.22)     | 31                                                   | Small town                          |
| SN20-33 (0.22)     | 92                                                   | Small town                          |
| SN20-34 (0.22)     | 10                                                   | Small village                       |
| SN20-35 (0.22)     | 53                                                   | Small village                       |
| SN20-36 (0.22)     | 22                                                   | Big city                            |

**Table S4.** Results of PCA treatment of all data

|                              |             |             |
|------------------------------|-------------|-------------|
| Eigenvalues:                 | 7.13        | 2.49        |
|                              | Factor 1    | Factor 2    |
| Distance to pollution source | -0.46       | -0.43       |
| Latitude                     | -0.75       | -0.52       |
| Longitude                    | 0.68        | 0.51        |
| mg/l                         | 0.91        | -0.07       |
| pH                           | 0.23        | -0.34       |
| SC                           | 0.38        | 0.70        |
| Mn                           | 0.92        | 0.06        |
| Fe                           | 0.34        | 0.78        |
| Co                           | 0.91        | 0.14        |
| Ni                           | 0.69        | 0.56        |
| Cu                           | 0.02        | 0.48        |
| Zn                           | 0.20        | 0.34        |
| As                           | -0.11       | 0.53        |
| Cd                           | 0.47        | 0.79        |
| Sb                           | 0.10        | 0.59        |
| Pb                           | -0.03       | 0.96        |
| <b>Expl.Var</b>              | <b>4.84</b> | <b>4.79</b> |
| <b>Prp.Totl</b>              | <b>0.30</b> | <b>0.30</b> |

**Table S5.** Mean ( $\pm$ SD) concentration ( $\mu\text{g L}^{-1}$ ) of metals in river water and snow water in the three distinct parts of the Ob River main stem upstream and downstream of its confluence with Vasyugan and Irtysh.

| Element | Ob River (Tom–Vasyugan, n = 4) | Snow SN20-1–SN20-10 (n = 10) | Ob River (Vasyugan–Irtysh, n = 11) | Snow SN20-11–SN20-21 (n = 11) | Ob River (Irtysh–Salemal, n = 16) | Snow SN20-22–SN20-36 (n = 15) |
|---------|--------------------------------|------------------------------|------------------------------------|-------------------------------|-----------------------------------|-------------------------------|
| Mn      | 2.0 $\pm$ 1.48                 | 3.0 $\pm$ 2.0                | 18.0 $\pm$ 49.0                    | 1.4 $\pm$ 0.8                 | 4.5 $\pm$ 0.5                     | 0.9 $\pm$ 1.0                 |
| Fe      | 59 $\pm$ 62                    | 5.3 $\pm$ 2.9                | 440 $\pm$ 475                      | 3.0 $\pm$ 1.3                 | 664 $\pm$ 58                      | 1.2 $\pm$ 0.5                 |
| Co      | 0.04 $\pm$ 0.02                | 0.03 $\pm$ 0.02              | 0.07 $\pm$ 0.1                     | 0.01 $\pm$ 0.005              | 0.07 $\pm$ 0.01                   | 0.007 $\pm$ 0.008             |
| Ni      | 0.6 $\pm$ 0.2                  | 0.09 $\pm$ 0.04              | 0.9 $\pm$ 0.5                      | 0.06 $\pm$ 0.03               | 1.9 $\pm$ 0.1                     | 0.03 $\pm$ 0.016              |
| Cu      | 1.7 $\pm$ 0.5                  | 0.3 $\pm$ 0.2                | 1.7 $\pm$ 0.2                      | 0.2 $\pm$ 0.1                 | 2.3 $\pm$ 0.2                     | 0.2 $\pm$ 0.1                 |
| Zn      | 4.8 $\pm$ 3.2                  | 16 $\pm$ 22                  | 3.0 $\pm$ 1.5                      | 8.8 $\pm$ 10                  | 5.5 $\pm$ 3.2                     | 2.9 $\pm$ 1.3                 |
| As      | 1.4 $\pm$ 0.2                  | 0.3 $\pm$ 0.1                | 1.3 $\pm$ 0.5                      | 0.4 $\pm$ 0.3                 | 1.5 $\pm$ 0.07                    | 0.3 $\pm$ 0.2                 |
| Cd      | 0.01 $\pm$ 0.01                | 0.04 $\pm$ 0.006             | 0.009 $\pm$ 0.009                  | 0.03 $\pm$ 0.01               | 0.01 $\pm$ 0.006                  | 0.02 $\pm$ 0.01               |
| Sb      | 0.1 $\pm$ 0.02                 | 0.05 $\pm$ 0.07              | 0.1 $\pm$ 0.02                     | 0.02 $\pm$ 0.01               | 0.09 $\pm$ 0.004                  | 0.019 $\pm$ 0.01              |
| Pb      | 0.07 $\pm$ 0.1                 | 0.8 $\pm$ 0.4                | 0.2 $\pm$ 0.1                      | 0.8 $\pm$ 0.3                 | 0.2 $\pm$ 0.02                    | 0.5 $\pm$ 0.2                 |
